# Supplementary material for: Anti-GIP Antibodies and Future Diabetes Risk: Eight-Year Prospective Cohort Study
Source: Research Square preprint supplement (doi:10.21203/rs.3.rs-7864659/v1), 2025-11-20
Supplement: Supplementary file 1 [file 71d5434fd4010a5d963ee270.docx]

| Variable | DM type (mean ± SD) | Non DM type (mean ± SD) | p-value |
| --- | --- | --- | --- |
| Serum number | 30128.9 ± 78.4 | 30132.8 ± 78.2 | 0.83 |
| Anti GIP Ab (a.c) | 38173.1 ± 13464.7 | 30416.5 ± 13744.1 | 0.02 |
| Anti GLP Ab (a.c) | 23698.3 ± 11860.6 | 18785.4 ± 11423.7 | 0.08 |
| Gender (male: female) | 13: 8 | 83: 114 | 0.1 |
| Base line Age (yr) | 53.3 ± 8.3 | 51.3 ± 8.0 | 0.30 |
| Base line Height (cm) | 163.3 ± 10.1 | 163.6 ± 8.5 | 0.90 |
| Base line Weight (kg) | 72.0 ± 14.4 | 61.5 ± 13.4 | 0.004 |
| Base line BMI (kg/m2) | 26.8 ± 3.7 | 22.8 ± 3.6 | 0.0001 |
| Base line AST (U/mL) | 26.1 ± 10.5 | 22.2 ± 7.7 | 0.11 |
| Base line ALT (U/mL) | 32.2 ± 21.7 | 21.1 ± 12.7 | 0.03 |
| Base line γ-GTP (mg/dL) | 52.3 ± 35.4 | 32.0 ± 35.1 | 0.02 |
| Base line HbA1C (%) | 5.9 ± 0.3 | 5.5 ± 0.2 | 0.0000 |
| Base line LDL-C (mg/dL) | 131.5 ± 28.1 | 124.2 ± 31.3 | 0.27 |
| Base line TC (mg/dL) | 207.2 ± 30.5 | 206.2 ± 32.12 | 0.88 |
| Base line TG (mg/dL) | 136.8 ± 86.6 | 97.3 ± 88.6 | 0.06 |
| Base line HDL-C (mg/dL) | 60.7 ± 19.7 | 69.3 ± 19.8 | 0.07 |
| Base line Total Protein (g/dL) | 7.3 ± 0.4 | 7.1 ± 0.4 | 0.24 |
| Base line Alb (g/dL) | 4.4 ± 0.2 | 4.4 ± 0.3 | 0.14 |
| Base line BUN (mg/dL) | 13.4 ± 4.0 | 14.0 ± 3.7 | 0.56 |
| Base line Cre (mg/dL) | 0.83 ± 0.3 | 0.72 ± 0.1 | 0.13 |
| Base line eGFR | 72.2 ± 13.3 | 78.2 ± 12.7 | 0.08 |
| Base line UA (mg/dL) | 6.0 ± 1.1 | 5.1 ± 1.2 | 0.002 |
|  |  |  |  |
| Observation period (yr) | 7.8± 3.5 | 8.2 ± 2.8 | 0.60 |
| Follow up Weight (kg) | 71.8 ± 11.9 | 61.95 ± 14.4 | 0.002 |
| Follow up BMI (kg/m2) | 27.0 ± 3.2 | 23.2 ± 3.9 | 0.0000 |
| Follow up West circumference (cm) | 93.0 ± 7.8 | 83.46 ± 11.0 | 0.0000 |
| Follow up ALT (U/dL) | 34.5 ± 20.3 | 20.9 ± 14.0 | 0.007 |
| Follow up gGT | 50.19 ± 35.5 | 30.90 ± 26.8 | 0.02 |
| Follow up FBS (mg/dL) | 149.5 ± 32.3 | 101.2 ± 8.8 | 0.0000 |
| Follow up HbA1c (%) | 7.1 ± 1.3 | 5.6 ± 0.3 | 0.0001 |
| Follow up LDL-C (mg/dL) | 126.4 ± 30.9 | 127.3 ± 30.3 | 0.89 |
| Follow up TC (mg/dL) | 206.8 ± 32.9 | 215.0 ± 34.0 | 0.30 |
| Follow up TG (mg/dL) | 122.1 ± 54.0 | 99.3 ± 58.5 | 0.08 |
| Follow up HDLC (mg/dL) | 61.4 ± 18.4 | 72.0 ± 21.3 | 0.02 |
| Follow up UA (mg/dL) | 5.3 ± 1.30 | 5.3 ± 1.1 | 0.97 |
| Follow up Cre (mg/dL) | 0.84 ± 0.3 | 0.78 ± 0.1 | 0.34 |
| Follow up eGFR | 69.8 ± 14.2 | 693 ± 11.9 | 0.88 |

**Supplemental Table 1. Comparison of baseline characteristics and laboratory parameters between diabetes type (defined as fasting blood glucose (FBS) ≥ 126 mg/dL or HbA1c ≥ 6.5%) and non-diabetes type (defined as FBS ≥ 126 mg/dL or HbA1c ≥ 6.5%)**

During follow-up, 21 of the 218 participants (6.0%) developed diabetes type.

Parameters pertaining to participants who remained non-diabetic were compared with those of the participants who had developed diabetes during follow-up. Data are expressed as the mean values for each group. Statistical differences between the two groups were evaluated using the Mann–Whitney U test. *Statistical significance was set at p < 0.05.
